# Supplementary material for: The Effect of Animate-Inanimate Soundscapes and Framing on Environments’ Evaluation and Predicted Recreation Time
Source: PubMed Central journal article supplement (PMC7730829; doi:10.3390/ijerph17239086), 2020-12-05
Supplement: ijerph-17-09086-s001.pdf [file ijerph-17-09086-s001.pdf]

**Table S1.** The Links to the Audio Files from the BBC Sound Effects and Field Recordings Library.

| <b>Soundscapes</b>            | <b>Description</b>                                              | <b>Link</b>                                                                                                                         |
|-------------------------------|-----------------------------------------------------------------|-------------------------------------------------------------------------------------------------------------------------------------|
| Falling water                 | “Cascade of numerous small waterfalls.”                         | <a href="http://bbcsfx.acropolis.org.uk/?q=waterfall">http://bbcsfx.acropolis.org.uk/?q=waterfall</a>                               |
| Swimming                      | “Outdoor swimming pool, swimmer enters water, breast stroke...” | <a href="http://bbcsfx.acropolis.org.uk/?q=outdoor+swimming">http://bbcsfx.acropolis.org.uk/?q=outdoor+swimming</a>                 |
| Ice skating                   | “Ice Skating, one person circling close...”                     | <a href="http://bbcsfx.acropolis.org.uk/?q=ice+skating">http://bbcsfx.acropolis.org.uk/?q=ice+skating</a>                           |
| A trotting and snorting horse | “One horse trots past through grass, right to left.”            | <a href="http://bbcsfx.acropolis.org.uk/?cat=horses&amp;q=grass">http://bbcsfx.acropolis.org.uk/?cat=horses&amp;q=grass</a>         |
| Singing birds                 | “Birds at watering hole, Madumbalai National Park...”           | <a href="http://bbcsfx.acropolis.org.uk/?q=madumbalai+national+park">http://bbcsfx.acropolis.org.uk/?q=madumbalai+national+park</a> |
| Running and bleating goats    | “Goats mating, with other goats bleating in background...”      | <a href="http://bbcsfx.acropolis.org.uk/?q=goat">http://bbcsfx.acropolis.org.uk/?q=goat</a>                                         |
